# Supplementary material
Source: MDPI journal article supplement (https://www.mdpi.com/2073-4433/8/6/103)
Supplement: s1 [file s1]

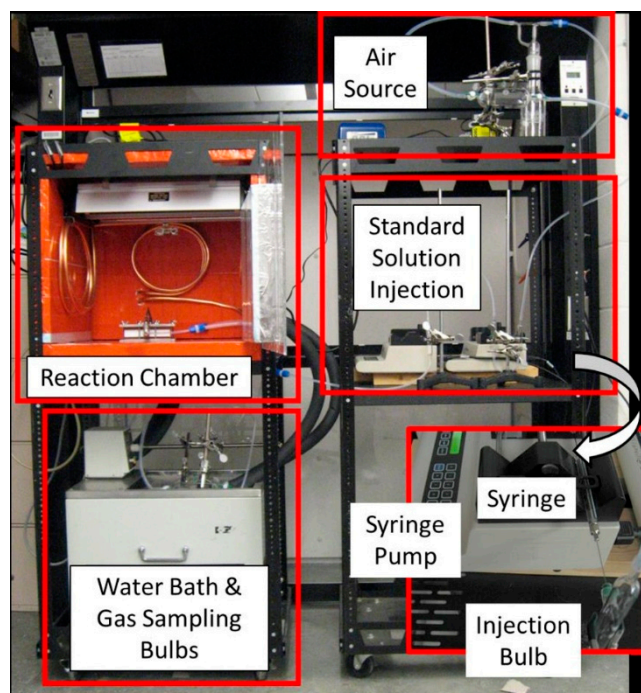

**Figure S1.** Photo of the laboratory-scale set-up for testing the effects of light and special coatings on standard gas mixtures of volatile organic compounds (in this photo, the system is rolled outside of the walk-in fume hood. All tests were completed inside the hood). The bottom photo is a close-up of the standard gas mixture to air pumped through the system. (Iowa State University Air Quality Lab).
